# Supplementary material for: Pathogen effector AvrSr35 triggers Sr35 resistosome assembly via a direct recognition mechanism
Source: PubMed Central journal article supplement — Sci Adv. 2022 Sep 9;8(36):eabq5108. doi: 10.1126/sciadv.abq5108 (PMC9462685; doi:10.1126/sciadv.abq5108), 2022-09-09
Supplement: sciadv.abq5108_sm.pdf [file sciadv.abq5108_sm.pdf]

Supplementary Materials for  
**Pathogen effector AvrSr35 triggers Sr35 resistosome assembly via a direct  
recognition mechanism**

Yan-Bo Zhao *et al.*

Corresponding author: Songying Ouyang, [ouyangsy@fjnu.edu.cn](mailto:ouyangsy@fjnu.edu.cn); Peiyi Wang, [wangpy@sustech.edu.cn](mailto:wangpy@sustech.edu.cn)

*Sci. Adv.* **8**, eabq5108 (2022)  
DOI: 10.1126/sciadv.abq5108

**This PDF file includes:**

Figs. S1 to S8  
Tables S1 to S8

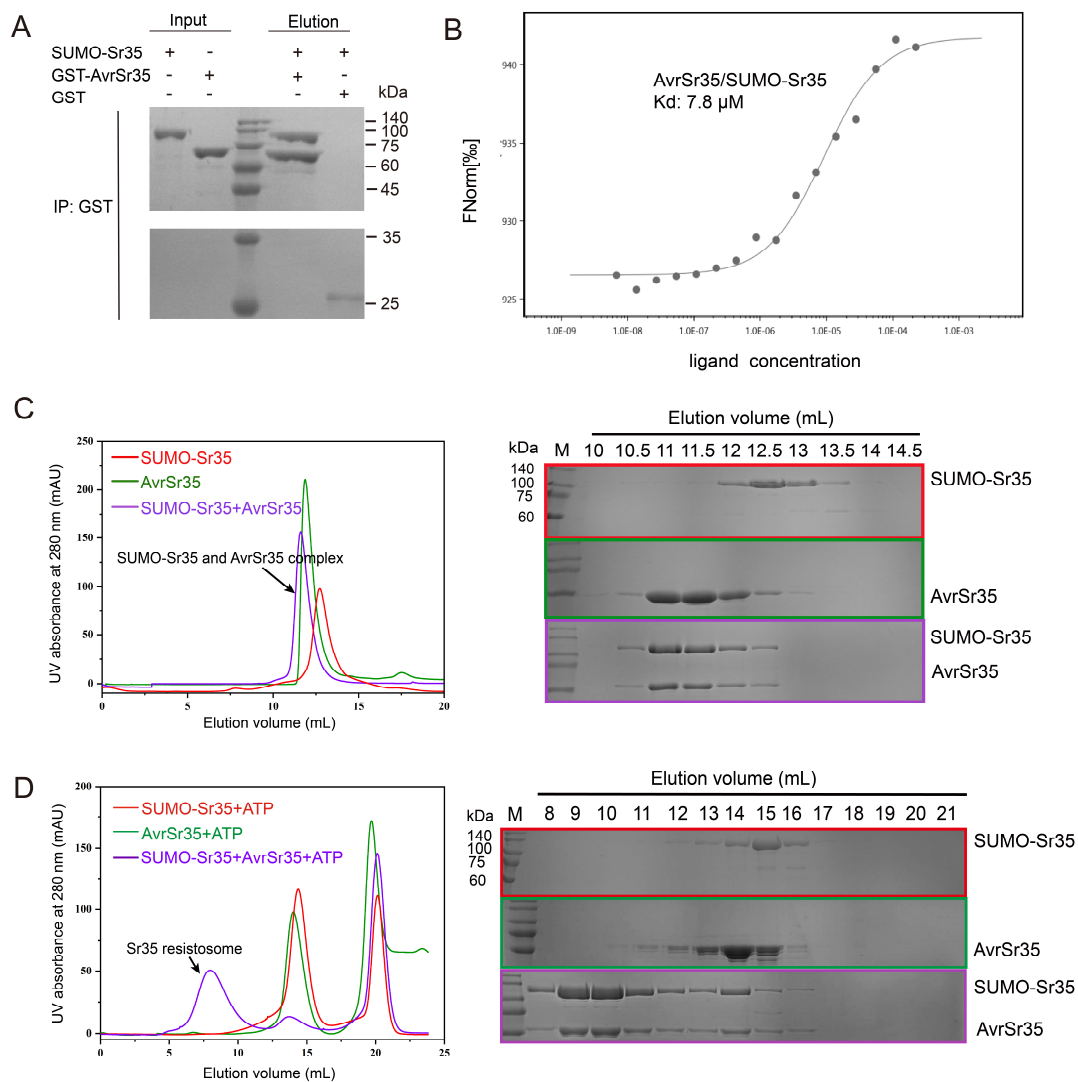

**Fig. S1. Purification and reconstitution of Sr35-AvrSr35 complex and the Sr35 resistosome.**

(A) Sr35 interacts with AvrSr35 in GST pull down assay. GST-tagged AvrSr35 was incubated with SUMO-tagged Sr35, followed by affinity capture with glutathione resin. Eluted protein samples were analyzed using SDS-PAGE and Coomassie Blue staining. (B) Measurement of binding affinity between Sr35 and AvrSr35 with microscale thermophoresis (MST). The experiment was performed in binding buffer (25 mM HEPES (pH 7.5), 500 mM NaCl). The dissociation constant ( $K_d$ ) of 7.8  $\mu$ M is indicated above the binding curve. (C) Analysis of Sr35-AvrSr35 complex formation by gel filtration. SUMO-tagged Sr35 was incubated with AvrSr35 at 1:2 molar ratio at 4  $^{\circ}$ C for 2 h, after

which the mixture was analyzed using gel filtration column (Superdex 200, GE Healthcare). SUMO-tagged Sr35 and AvrSr35 samples were used as controls. Left panel: gel filtration profiles of SUMO-Sr35 (red), AvrSr35 (green), and the SUMO-Sr35-AvrSr35 complex (purple). Right panel: SDS-PAGE analysis of the peak fractions displayed in the left panel. The rectangles enclosing each gel are color-coded according to the left panel. Approximate corresponding elution volumes are displayed above the gels. **(D)** Oligomerization of Sr35-AvrSr35 complex in the presence of ATP. SUMO-Sr35 was mixed with AvrSr35 at 1:2 molar ratio in the presence of 1 mM ATP and incubated overnight at 4 °C, followed by analysis using gel filtration column (Superose 6, GE Healthcare). In the presence of ATP, the Sr35-AvrSr35 complex oligomerizes, whereas Sr35 or AvrSr35 alone do not. Left panel: gel filtration profiles of SUMO-tagged Sr35 (red), AvrSr35 (green) and SUMO-tagged Sr35-AvrSr35 complex (purple). SDS-PAGE analysis of the peak fractions displayed in the left panel. The rectangles enclosing each gel are color-coded according to the left panel. Approximate corresponding elution volumes are displayed above the gels.

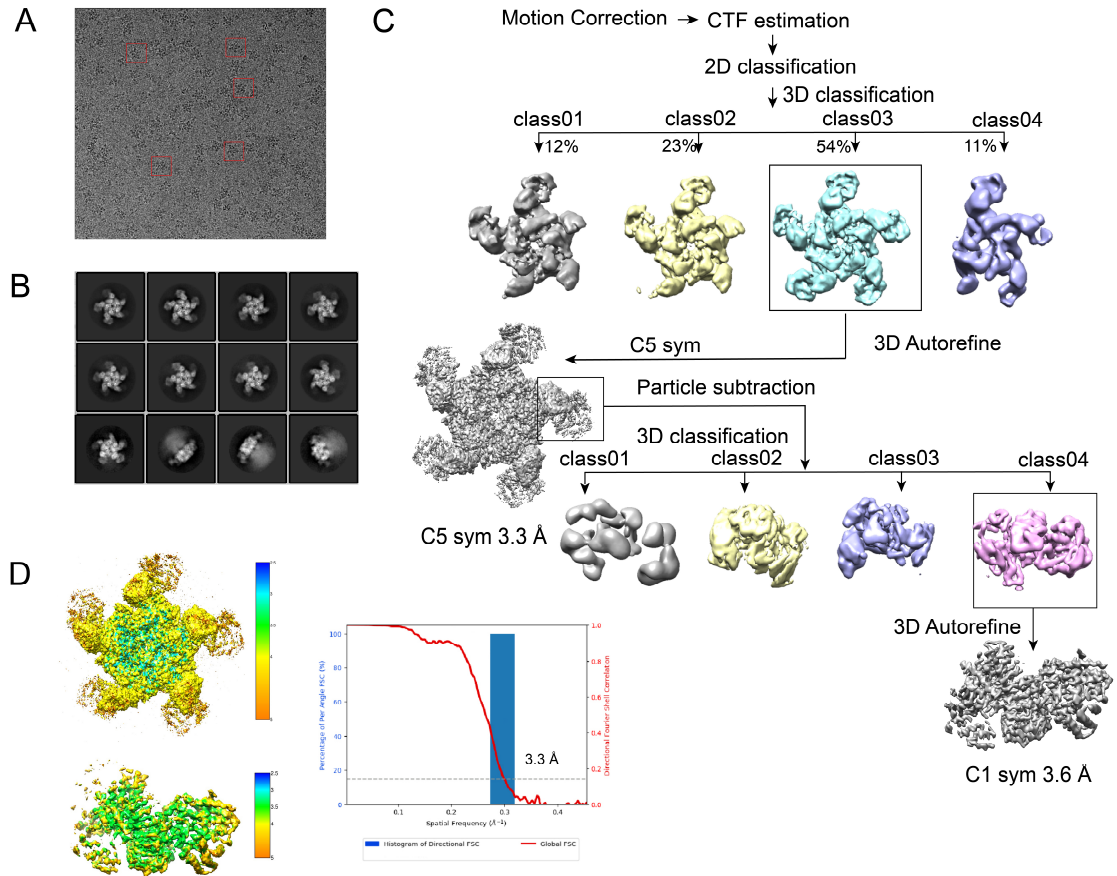

**Fig. S2. 3D reconstruction of the Sr35 resistosome induced by wild-type AvrSr35.** (A) Representative electron micrograph of Sr35 resistosome embedded in vitreous ice. (B) Representative views of 2D class averages. (C) Flowchart of Cryo-EM data processing and 3D reconstruction of the Sr35 resistosome. (D) Local resolution map calculated using Relion for Sr35 resistosome (top) and subtraction part (bottom). Right panel: FSC curves at 0.143 of the final reconstruction of the Sr35 resistosome.

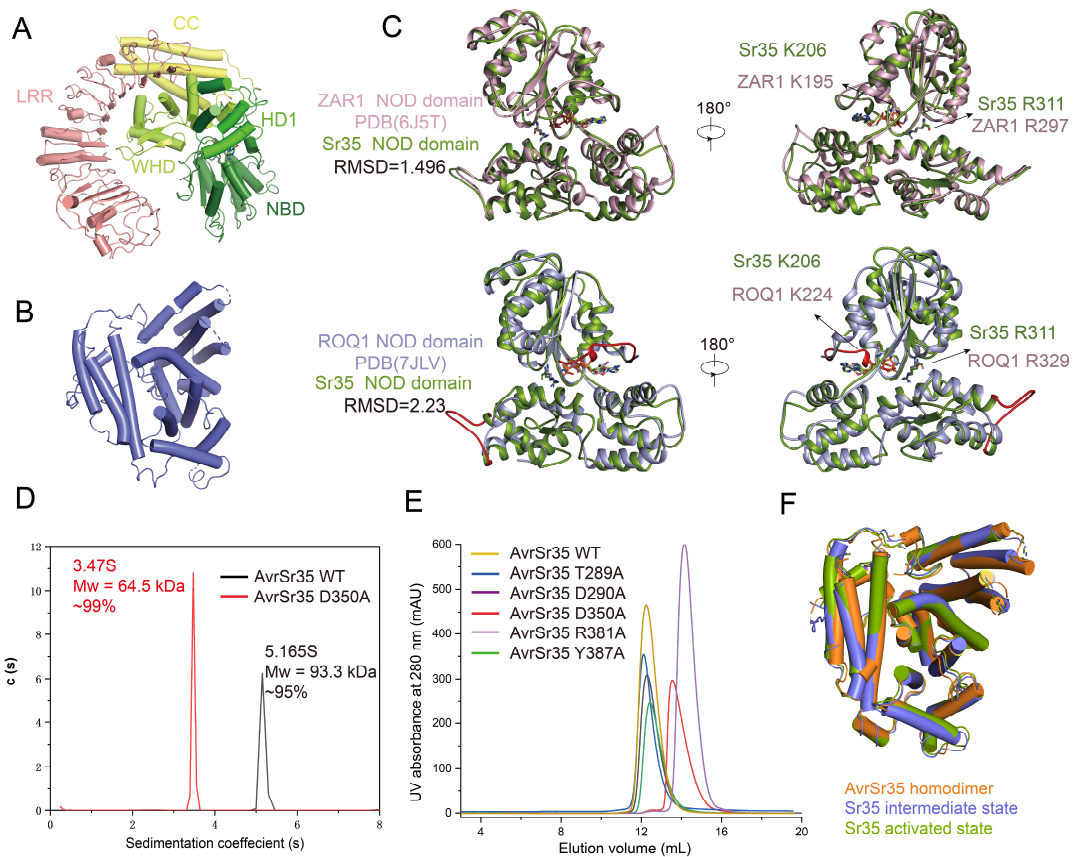

**Fig. S3. Structures of Sr35 and AvrSr35 in active Sr35 complex.** (A) The cartoon representation of Sr35 in Sr35 resistosome structure. CC, yellow; NBD, WHD, and HD1, forest, TV green, and limon, respectively; LRR, salmon. (B) Cartoon representation of AvrSr35 in Sr35 resistosome structure. (C) Structural comparison between the NOD domains of Sr35 and its homologues ZAR1 (top) and ROQ1 (bottom) in oligomerized state. Since the Sr35 and ROQ1 resistosomes have different aggregation states, the Sr35 loops contacting neighboring protomer (indicated in red) have different spatial conformations compared to their counterparts in ROQ1 NOD domain. Key amino acid residues involved in (d)ATP binding are labeled and RMSD values are indicated. (D) Analytical ultracentrifugation (AUC) assay of the AvrSr35 and AvrSr35<sup>D350A</sup>. (E) Gel filtration chromatograms of wild-type AvrSr35 and its mutant variants. Please note that the elution volumes of AvrSr35 mutants R381A and D350A are significantly increased. (F) Structural alignment of AvrSr35 from

homodimer (orange) and Sr35-bound AvrSr35 (from intermediated state and activated state) (green and slate) showed a high similarity with a root mean square deviation (RMSD) value of 1.067 Å and 1.277 Å respectively.

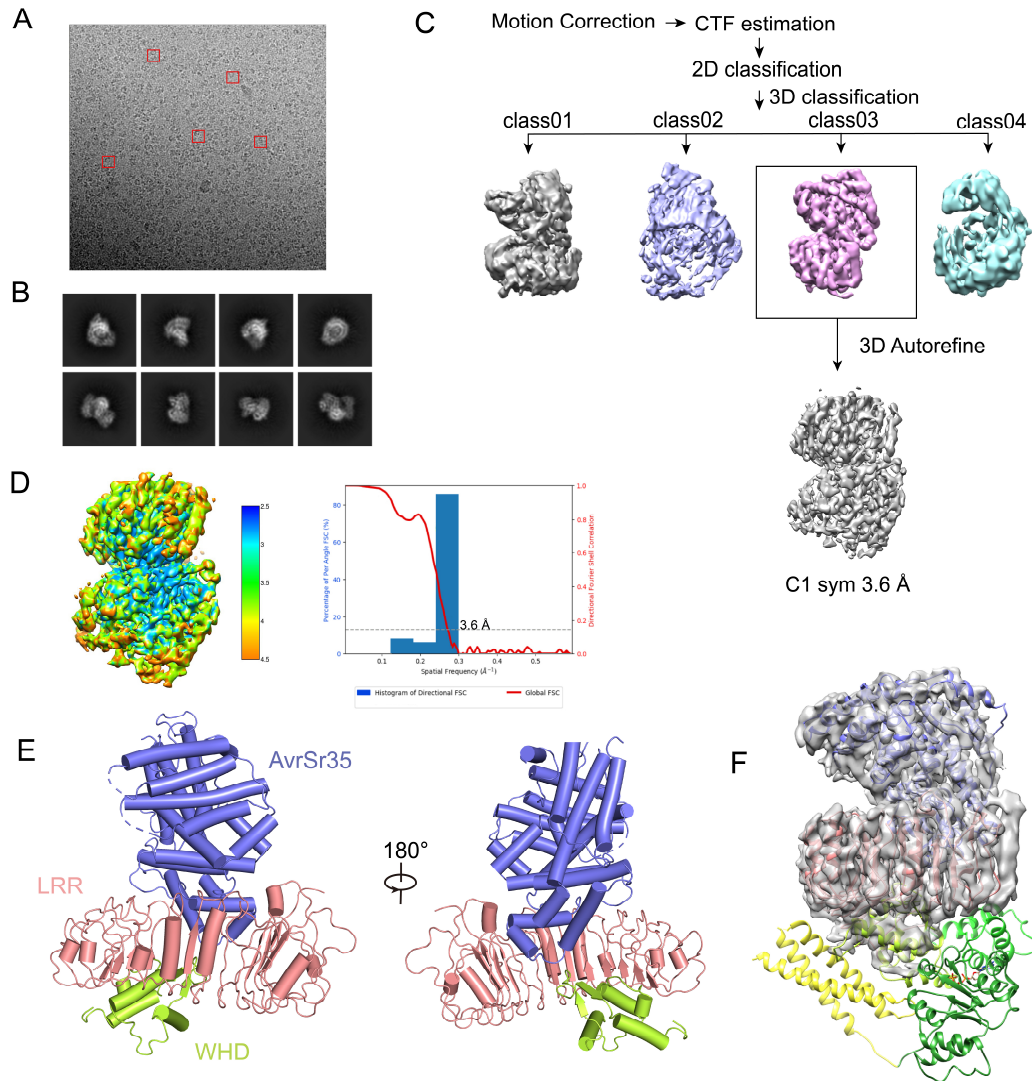

**Fig. S4. 3D reconstruction of Sr35 and AvrSr35 complex.** (A) Representative electron micrograph of Sr35-AvrSr35 complex embedded in vitreous ice. (B) Representative views of 2D class averages. (C) Flowchart of cryo-EM data processing and 3D reconstruction of the Sr35-AvrSr35 complex. (D) Local resolution map for the Sr35-AvrSr35 complex calculated using cryoSPARC. Right panel: FSC curves at 0.143 of the final reconstruction of the Sr35-AvrSr35 complex. (E) Overall structure of binary complex of Sr35 and AvrSr35. (F) The fitting of Sr35 resistosome protomer model into cryo-EM map of Sr35-AvrSr35 complex. The domains of Sr35 are

shown in different colors: CC, yellow; NBD, WHD, and HD1, forest, TV green, and limon, respectively; LRR, salmon. AvrSr35 is colored slate.



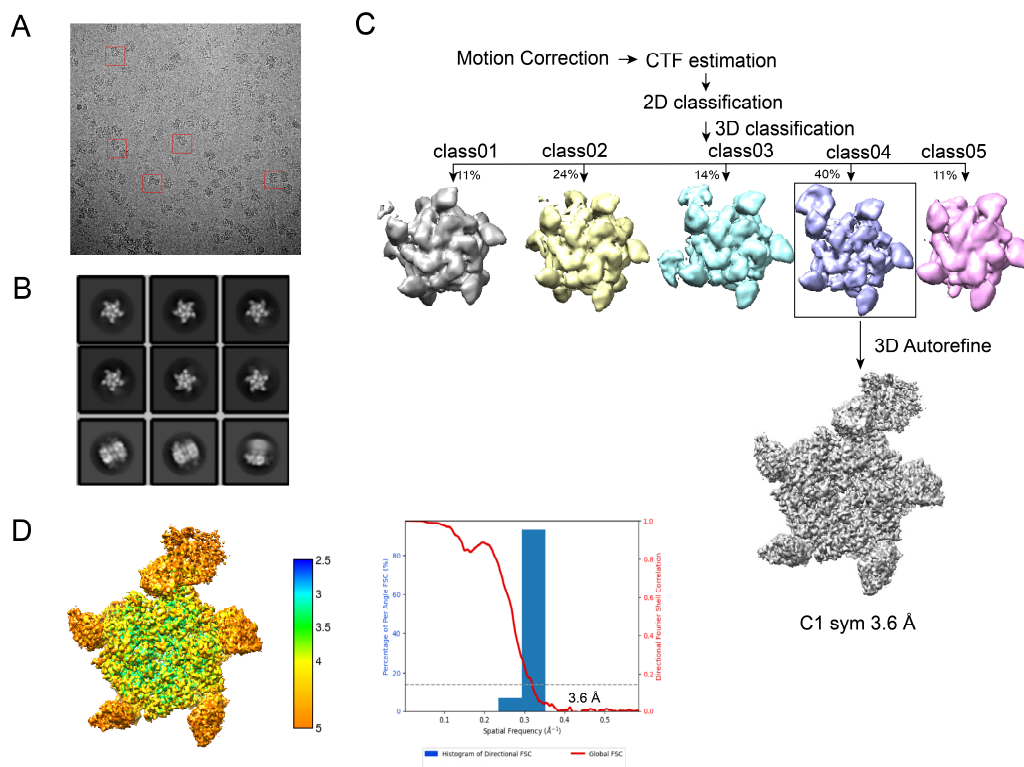

**Fig. S5. 3D reconstruction of the SUMO-tagged Sr35 resistosome induced by AvrSr35<sup>R381A</sup>.**

(A) Representative electron micrograph of AvrSr35<sup>R381A</sup> induced SUMO-Sr35 resistosome embedded in vitreous ice. (B) Representative views of 2D class averages. (C) Flowchart of Cryo-EM data processing and 3D reconstruction of the AvrSr35<sup>R381A</sup> induced SUMO-Sr35 resistosome. (D) Local resolution map calculated using Relion for AvrSr35<sup>R381A</sup> induced Sr35 resistosome. Right panel: FSC curves at 0.143 of the final reconstruction of the Sr35 resistosome.

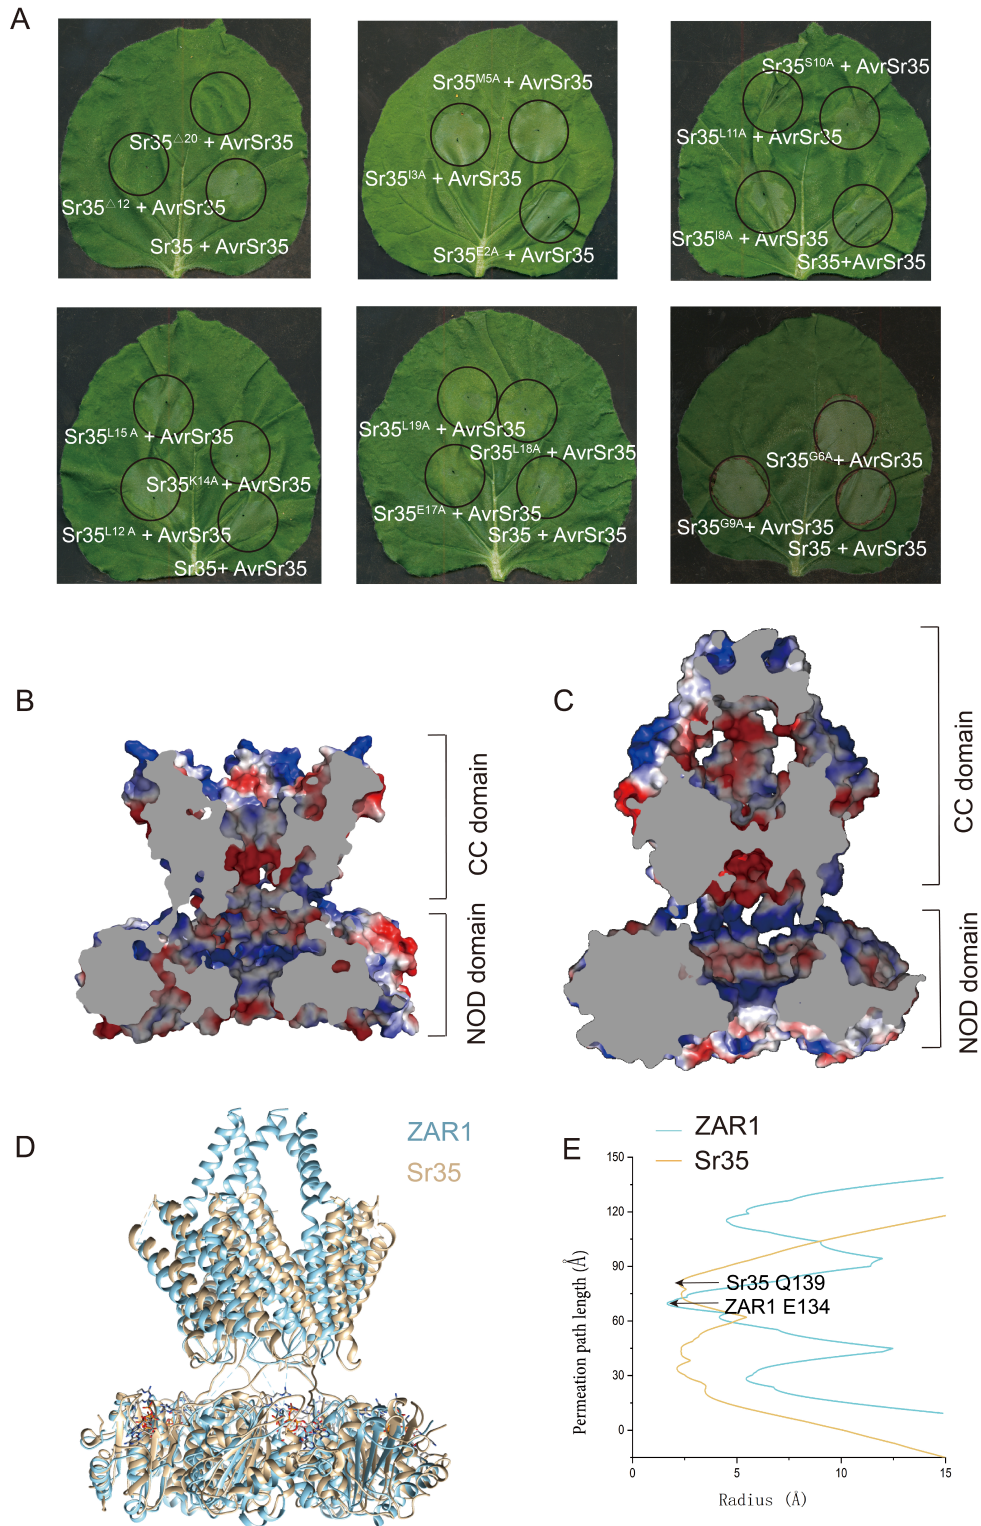

**Fig. S6. The predicted very N-terminal helix is indispensable for Sr35-mediated immune signaling and cell death. (A)** Co-infiltration of tobacco leaves with wild-type or mutant variants of Sr35 and AvrSr35 constructs. The images were taken 36–48 hpi. The experiment was performed

three times. **(B)** and **(C)** Cross-sections of central pores in Sr35 and ZAR1 resistosomes with the electrostatic potential shown on the external surface of the molecular envelope. **(D)** Superimposition of pore-forming domains (including CC, NBD, and HD1 domain) of Sr35 and ZAR1 (PDB: 6J5T). **(E)** Plot depicting the pore radius as a function of the pore axis. The central cavity and intracellular cavity are indicated.

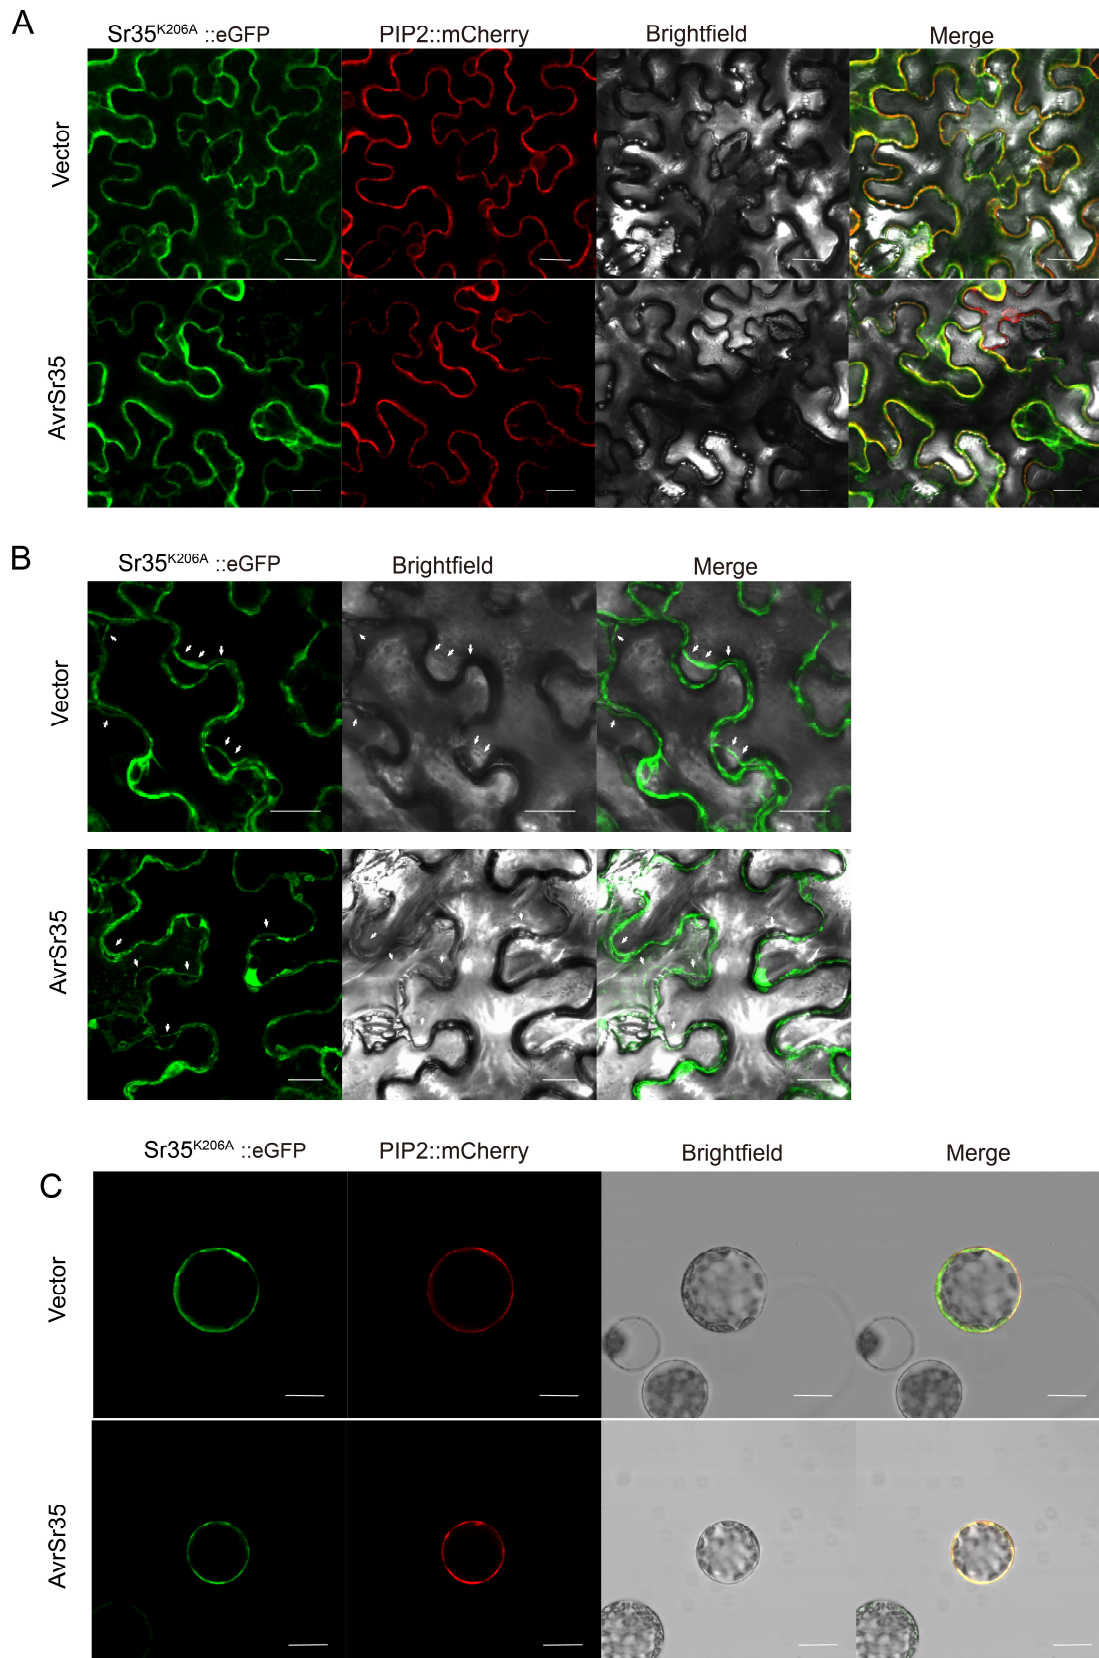

**Fig. S7. Subcellular localization of Sr35<sup>K206A</sup>.** (A) Localization of eGFP-tagged Sr35<sup>K206A</sup> (Sr35<sup>K206A</sup>::eGFP) in *N. benthamiana* in the absence or presence of AvrSr35. (B) Subcellular

localization of Sr35<sup>K206A</sup>::eGFP in *N. benthamiana* in the absence or presence of AvrSr35 after plasmolysis. Retracted PM is indicated by white arrows. (C) Subcellular localization of Sr35<sup>K206A</sup>::eGFP in protoplasts in the absence or presence of AvrSr35. Cell membranes were traced using mCherry-tagged PIP2 (PIP2::mCherry). Scale bar: 20  $\mu$ M.

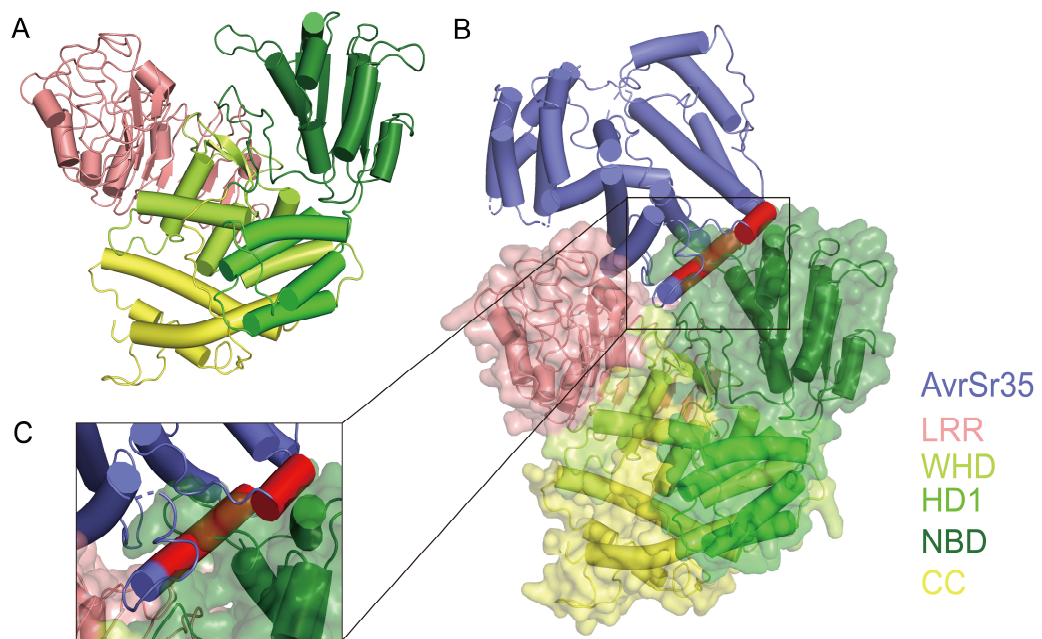

**Fig. S8. Steric hindrance between AvrSr35 and Sr35<sup>NOD</sup> upon Sr35 activation.** (A) Modeled structure of inactive Sr35. (B) Structural alignment of the modeled inactive Sr35 with AvrSr35-bound Sr35. (C) The steric clash between inactive Sr35 and AvrSr35 which is shown in red. The domains and subdomains of Sr35 are shown in different colors: CC, yellow; NBD, WHD, and HD1, forest, TV green, and limon, respectively; LRR, salmon. AvrSr35 is colored slate.

**Table S1. Cryo-EM statistics and model refinement for the Sr35 resistosome**

| Data collection                                           | Sr35 resistosome         | AvrSr35 <sup>R381A</sup> induced |                          |
|-----------------------------------------------------------|--------------------------|----------------------------------|--------------------------|
|                                                           |                          | SUMO- Sr35 resistosome           | Sr35-AvrSr35 complex     |
| Cryo-electron microscope voltage (kV)                     | 300                      | 300                              | 300                      |
| Detector                                                  | Gatan K3 Summit          | Gatan K3 Summit                  | Gatan K2 Summit          |
| Energy filter slit width (eV)                             | 20                       | 20                               | 8                        |
| Magnification                                             | 81,000×                  | 81,000 ×                         | 165,000 ×                |
| Pixel size (Å)                                            | 1.09                     | 1.09                             | 0.84                     |
| Total electron exposure (e <sup>-</sup> /Å <sup>2</sup> ) | 50                       | 50                               | 50                       |
| Number of frames collected                                | 32                       | 32                               | 32                       |
| Defocus range (μm)                                        | -1.0~-1.6                | -1.0~-1.6                        | -1.2~-1.8                |
| Automation software                                       | EPU                      | EPU                              | SeriEM                   |
| <b>3D reconstruction</b>                                  |                          |                                  |                          |
| Software                                                  | Relion                   | Relion                           | Relion; cryoSPARC        |
| Total number particles for final refinement               | 54000                    | 30530                            | 85070                    |
| Symmetry imposed                                          | C5                       | C1                               | C1                       |
| Resolution range (Å)                                      | 3.0-4.0                  | 3.5-4.5                          | 3.0-4.0                  |
| Resolution (Å) after refinement (FSC=0.143)               | 3.3                      | 3.6                              | 3.6                      |
| Map sharpening B-factor (Å <sup>2</sup> )                 | -100                     | -50                              | -85                      |
| <b>Refinement and validation</b>                          |                          |                                  |                          |
| Software                                                  | phenix.real_space_refine | phenix.real_space_refine         | phenix.real_space_refine |
| Model resolution (Å)                                      | 3.3                      | 3.6                              | 3.6                      |
| Model composition                                         |                          |                                  |                          |
| Non-hydrogen atoms                                        | 49700                    | 36448                            | 6444                     |
| Protein residues                                          | 6160                     | 4529                             | 795                      |
| Map-model CC (overall/local)                              | 0.76                     | 0.82                             | 0.78                     |
| <b>B factors (Å<sup>2</sup>)</b>                          |                          |                                  |                          |
| R.M.S deviations                                          |                          |                                  |                          |
| Bonds lengths (Å)                                         | 0.003                    | 0.005                            | 0.004                    |
| Bonds angles (°)                                          | 0.641                    | 0.797                            | 0.727                    |
| MolProbity score                                          | 2.09                     | 2.24                             | 2.02                     |

**Table S1. Cont.**

| <b>Data collection</b> | <b>Sr35 resistosome</b> | <b>AvrSr35R381A induced<br/>SUMO- Sr35 resistosome</b> | <b>Sr35-AvrSr35 complex</b> |
|------------------------|-------------------------|--------------------------------------------------------|-----------------------------|
| Clash score            | 12.11                   | 15.06                                                  | 12.75                       |
| Rotamer outliers (%)   | 0.05                    | 0.00                                                   | 0.28                        |
| C $\beta$ outliers (%) | 0                       | 0.00                                                   | 0.00                        |
| CaBLAM outliers (%)    | 4.93                    | 5.39                                                   | 3.26                        |
| EMRinger score         |                         |                                                        |                             |
| Ramachandran plot (%)  |                         |                                                        |                             |
| Favored region         | 91.89                   | 89.82                                                  | 93.98                       |
| Allowed region         | 8.09                    | 10.18                                                  | 5.89                        |
| Outlier region         | 0.02                    | 0.00                                                   | 0.13                        |



**Table S2. Data collection and optimization information of X-ray crystal structure of AvrSr35**

| Dataset                                                 | SeMet-AvrSr35                                 |
|---------------------------------------------------------|-----------------------------------------------|
| <b>Data collection</b>                                  |                                               |
| Beamline                                                | SSRF BL19-U1                                  |
| Wavelength (Å)                                          | 0.9792                                        |
| Space group                                             | P2 <sub>1</sub> 2 <sub>1</sub> 2 <sub>1</sub> |
| Cell dimensions                                         |                                               |
| <i>a</i> , <i>b</i> , <i>c</i> (Å)                      | 54.12, 115.273, 143.162                       |
| <i>α</i> , <i>β</i> , <i>γ</i> (°)                      | 90.00, 90.00, 90.00                           |
| Resolution range (Å)                                    | 44.89-2.06 (2.134-2.06)                       |
| Completeness (%)                                        | 97.71 (98.59)                                 |
| Average <i>I</i> /σ( <i>I</i> )                         | 19 (11.7)                                     |
| <i>R</i> <sub>merge</sub>                               | 0.142 (0.316)                                 |
| Multiplicity                                            | 26.3 (5.4)                                    |
| <b>Refinement</b>                                       |                                               |
| Resolution (Å)                                          | 2.06                                          |
| No. reflections                                         | 55013 (5445)                                  |
| <i>R</i> <sub>work</sub> / <i>R</i> <sub>free</sub> (%) | 24.42 (30.37)/27.37 (32.99)                   |
| No. atoms                                               |                                               |
| Protein                                                 | 743                                           |
| Solvent                                                 | 57                                            |
| Average <i>B</i> -factors (Å <sup>2</sup> )             | 32.25                                         |
| R.m.s deviations                                        |                                               |
| Bond lengths (Å)                                        | 0.014                                         |
| Bond angles (°)                                         | 1.66                                          |
| Ramachandran plot (%)                                   |                                               |
| Favored region                                          | 98.20                                         |
| Allowed region                                          | 1.80                                          |
| Outliers region                                         | 0.1557                                        |

\*Highest resolution shell is shown in parentheses.

**Table S3. Buried surface area of the AvrSr35 dimerization surface and AvrSr35-Sr35 complex**

|                                               | AvrSr35 dimer |           | AvrSr35-Sr35 complex |         |
|-----------------------------------------------|---------------|-----------|----------------------|---------|
|                                               | AvrSr35-1     | AvrSr35-2 | AvrSr35              | Sr35    |
| <b>Number of residues</b>                     |               |           |                      |         |
| interface                                     | 23            | 21        | 30                   | 37      |
| surface                                       | 347           | 343       | 393                  | 821     |
| total                                         | 375           | 368       | 394                  | 838     |
| <b>Solvent-accessible area, Å<sup>2</sup></b> |               |           |                      |         |
| interface                                     | 716.5         | 713.7     | 1206.2               | 1165.5  |
| total                                         | 18068.5       | 17640.3   | 21210.9              | 43071.9 |
| <b>Solvation energy, kcal/mol</b>             |               |           |                      |         |
| isolated structure                            | -339.2        | -332.1    | 361.1                | -824.6  |
| gain on complex formation                     | -2.4          | -0.9      | 0.9                  | -0.9    |
| average gain                                  | -1.8          | -1.7      | -2.9                 | -3.2    |
| P-value                                       | 0.422         | 0.633     | 0.877                | 0.745   |
| <b>Buried surface area, Å<sup>2</sup></b>     | 1430.2        |           | 2371.7               |         |

\*Interface areas were calculated using PISA (<https://www.ebi.ac.uk/pdbe/pisa/>)

**Table S4. Primers used in this study**

| Primer name                         | Primer sequence 5'-3'                      |
|-------------------------------------|--------------------------------------------|
| Sr35 BP F                           | AAAAAGCAGGCTTCATGGAGATTGCCATGGGG           |
| Sr35 BP R                           | AGAAAGCTGGGTCCCATATATCGAGGATGGGACG         |
| Sr35 BamH1 F                        | CGCGGATCCATGGAGATTGCCATGGGG                |
| Sr35 Xho1 R                         | CCGCTCGAGTTATCACCATATATCGAGGATGG           |
| Sr35 <sup>Δ12</sup> BamH1 F         | CGCGGATCCCCGAAGCTCGGGCAGCTGCTCATC          |
| Sr35 <sup>Δ20</sup> BamH1 F         | CGCGGATCCGGCGAGATCACCCCTGGAGAAAAAAG        |
| Sr35 <sup>Δ12</sup> BP F            | AAAAAGCAGGCTTCCCGAAGCTCGGGCAGC             |
| Sr35 <sup>Δ20</sup> BP F            | AAAAAGCAGGCTTCGGCGAGATCACCCCTGGAG          |
| AvrSr35 ΔSP BamH1 F                 | CGCGGATCCATGGTACAAATAGATGACCGAAAGGC        |
| AvrSr35 ΔSP Xho1 R                  | CCGCTCGAGTTACAATTTGCCTTCATGAACATTGG        |
| AvrSr35 ΔSP LIC F                   | TACTTCCAATCCAATGCCATGAGGAACTTTGCTGCAGATAGA |
| AvrSr35 ΔSP LIC R                   | TTATCCACTTCCAATGTTACAATTTGCCTTCATGAACATTGG |
| AvrSr35 C-stop ΔSP BP F             | AAAAAGCAGGCTTC ATGAGGAACTTTGCTGCAGATAGAGTC |
| AvrSr35 C-stop ΔSP BP R             | AGAAAGCTGGGTCCAATTTGCCTTCATGAACATTGGATG    |
| Sr35 <sup>Q139A</sup> F             | GCTGCGTGCAGGTTACGAGCAAGAGATGCGGGACACTAG    |
| Sr35 <sup>Q139A</sup> R             | GTACCTCGCACGCAGCTCGGCCAACTGCTTTGCTTGAAG    |
| Sr35 <sup>Y141A</sup> F             | TCAGAGGGCCGAGCAAGAGATGCGGGACACTA           |
| Sr35 <sup>Y141A</sup> R             | CTTGCTCGGCCCTCTGACGCAGCTCGGCCAAC           |
| Sr35 <sup>R157A</sup> F             | ACCTGCCATGATGGCCTTGTACACAGATGTGACA         |
| Sr35 <sup>R157A</sup> R             | CATCATGGCAGGGTCAACACTAGTATTAGCACTA         |
| Sr35 <sup>K206A</sup> F             | GTTAGGCGCGACGACTCTTGCCAAAGCAGCATAACG       |
| Sr35 <sup>K206A</sup> R             | GAGTCGTCGCGCCTAACCCACCAAATCCAACAAT         |
| Sr35 <sup>R311A</sup> F             | CAACCGCAAATGTTAGTGTCTCTGAAGCATGTTGC        |
| Sr35 <sup>R311A</sup> R             | AACATTTGCGGTTGTCGTGATTAGTCGGCTTCCGG        |
| Sr35 <sup>Y654A</sup> F             | TTGATGCTGGTATGAAGCTGCCATCTGGGATAGGC        |
| Sr35 <sup>Y654A</sup> R             | CATACCAGCATCAACATACAGGCACATTAGACGTCTTAG    |
| Sr35 <sup>D673A</sup> F             | TAGATGCCCTGGGGTTATCTGACGTGGACCTTGATT       |
| Sr35 <sup>D673A</sup> R             | CCAGGGCATCTAGCACTTCTAGGAAAGTCAGGTTGC       |
| Sr35 <sup>R730A</sup> F             | TCAATGCTGGACTCATCAATTGCTTGAGCGAACATT       |
| Sr35 <sup>R730A</sup> R             | GTCCAGCATTGACAAATACATCTAGACTGTCCAG         |
| Sr35 <sup>R755A</sup> F             | TCAAAAGCAAGTTGGTTCAAGACATTGCCGTCATGGATT    |
| Sr35 <sup>R755A</sup> R             | CAACTTGCTTTTGACGGGAAAGCCAATCTACAGAG        |
| Sr35 <sup>E809A</sup> F             | GTGTTTCGAGAAGCGCATGAGGTGGAAGCGCCCGTCC      |
| Sr35 <sup>E809A</sup> R             | GCTTCTGCGAACACAGAATAATTCCATATCTCAAG        |
| Sr35 <sup>R854H/W856R/T858S</sup> F | CCAAGGCTTAAACATCTTAGGTTTCAGCTTCCCA         |
| Sr35 <sup>R854H/W856R/T858S</sup> R | CACTTGGCTGGGAAGCTGAACCTAAGATGTTTAAAG       |
| Sr35 <sup>E2A</sup> F               | ATGGCGATTGCCATGGGGGCTATC                   |
| Sr35 <sup>E2A</sup> R               | GGCAATCGCCATGAAGCCTGCTTTTT                 |
| Sr35 <sup>I3A</sup> F               | ATGGAGGCTGCCATGGGGGCTATCG                  |
| Sr35 <sup>I3A</sup> R               | GGCAGCCTCCATGAAGCCTGCTTTTT                 |
| Sr35 <sup>M5A</sup> F               | ATTGCCGCGGGGCTATCGGCTCTC                   |
| Sr35 <sup>M5A</sup> R               | CCCCCGGGCAATCTCCATGAAGCC                   |

**Table S4. Cont.**

| Primer name                          | Primer sequence 5'-3'                           |
|--------------------------------------|-------------------------------------------------|
| Sr35 <sup>G6A</sup> R                | GCTTCGGGAGGAGAGAGCCGATAGCCGCCATGGCAATCTCCAT     |
| Sr35 <sup>L8A</sup> F                | GGGCTGCCGGCTCTCTCCTCCCGAA                       |
| Sr35 <sup>L8A</sup> R                | GAGCCGGCAGCCCCCATGGCAATCT                       |
| Sr35 <sup>G9A</sup> F                | TTGCCATGGGGGCTATCGCCTCTCTCCTCCCG                |
| Sr35 <sup>G9A</sup> R                | CGGGAGGAGAGAGGGCGATAGCCCCCATGGCAA               |
| Sr35 <sup>S10A</sup> F               | TATCGGCGCTCTCCTCCCGAAGCTCG                      |
| Sr35 <sup>S10A</sup> R               | GAGGAGAGCGCCGATAGCCCCCATG                       |
| Sr35 <sup>L11A</sup> F               | GGCTCTGCCCTCCCGAAGCTCGGGCA                      |
| Sr35 <sup>L11A</sup> R               | CGGGAGGGCAGAGCCGATAGCCCCCA                      |
| Sr35 <sup>L12A</sup> F               | CTCTCGCCCCGAAGCTCGGCGAGCTG                      |
| Sr35 <sup>L12A</sup> R               | CTTCGGGGCGAGAGAGCCGATAGCC                       |
| Sr35 <sup>K14A</sup> F               | CTCCCGGCGCTCGGCGAGCTGCTCAT                      |
| Sr35 <sup>K14A</sup> R               | CCGAGCGCCGGGAGGAGAGAGCCGA                       |
| Sr35 <sup>L15A</sup> F               | CCGAAGGCCGGGCGAGCTGCTCATCGG                     |
| Sr35 <sup>L15A</sup> R               | TCGCCGGCCTTCGGGAGGAGAGAGCC                      |
| Sr35 <sup>E17A</sup> F               | TCGGCGCGCTGCTCATCGGCGAGATC                      |
| Sr35 <sup>E17A</sup> R               | AGCAGCGCGCCGAGCTTCGGGAGGAG                      |
| Sr35 <sup>L18A</sup> F               | GCGAGGGCGCTCATCGGCGAGATCACC                     |
| Sr35 <sup>L18A</sup> R               | CGATGAGCGCCTCGCCGAGCTTCGGG                      |
| Sr35 <sup>L19A</sup> F               | GAGCTGGCCATCGGCGAGATCACCCT                      |
| Sr35 <sup>L19A</sup> R               | GCCGATGGCCAGCTCGCCGAGCTTCG                      |
| AvrSr35 <sup>D291A</sup> △SP F       | GAAGTTGATCACAGAGGCTGAGATGCTAAAAATTC             |
| AvrSr35 <sup>D291A</sup> △SP R       | GAATTTTTAGCATCTCAGCCTCTGTGATCAACTTC             |
| AvrSr35 <sup>D350A</sup> △SP F       | AAAAAATAAAGCAAGTGCTTCAAGCTATCTTGGATG            |
| AvrSr35 <sup>D350A</sup> △SP R       | CATCCAAGATAGCTTGAAGCACTTGCTTTATTTTTT            |
| AvrSr35 <sup>D379A</sup> △SP F       | GAAAGGAGTATGTTTTTCCAAGCTGGAAGAAAATATGCTGAATTG   |
| AvrSr35 <sup>D379A</sup> △SP R       | CAATTCAGCATATTTTTCTTCCAGCTTGGA AAAACATACTCCTTTC |
| AvrSr35 <sup>D379A/G380A</sup> △SP F | GAAAGGAGTATGTTTTTCCAAGCTGCAAGAAAATATGCTGAATTG   |
| AvrSr35 <sup>D379A/G380A</sup> △SP R | CAATTCAGCATATTTTTCTTGCAGCTTGGA AAAACATACTCCTTTC |
| AvrSr35 <sup>R381A</sup> △SP F       | ATGTTTTTCCAAGATGGAGCAAAATATGCTGAAT              |
| AvrSr35 <sup>R381A</sup> △SP R       | ATTCAGCATATTTTTGCTCCATCTTGGA AAAACAT            |
| AvrSr35 <sup>Y383A</sup> △SP F       | TTTTCCAAGATGGAAGAAAAGCTGCTGAATTGTATGCATT        |
| AvrSr35 <sup>Y383A</sup> △SP R       | AATGCATACAATTCAGCAGCTTTTCTTCCATCTTGGA AAA       |
| AvrSr35 <sup>Y387A</sup> △SP F       | AGAAAATATGCTGAATTGGCTGCATTTTCTAAAAGTCCC         |
| AvrSr35 <sup>Y387A</sup> △SP R       | GGGACTTTTAGAAAATGCAGCCAATTCAGCATATTTTTCT        |
| AvrSr35 <sup>E401A</sup> △SP F       | GGGGCGCACCTCAAAGATCTGTAGCTAAAATC                |
| AvrSr35 <sup>E401A</sup> △SP R       | AGGTGCGCCCCAGGTATTATTTTCTGTGGGGAC               |

**Table S5. Plasmids generated in this study for protein expression and pull-down assay.**

| <b>Construct</b>                       | <b>Plasmid</b> | <b>Primers</b>                                                                                        | <b>Template</b>                                                | <b>Cloning method</b>              |
|----------------------------------------|----------------|-------------------------------------------------------------------------------------------------------|----------------------------------------------------------------|------------------------------------|
| SUMO-Sr35                              | pFastBac 1     | Sr35 BamH1 F, Sr35 Xho1 R                                                                             | pET28a-Sr35 (synthetic gene)                                   | double digestion-ligation cloning  |
| SUMO-Sr35 <sup>Δ12</sup>               | pFastBac 1     | Sr35 <sup>Δ12</sup> BamH1 F, Sr35 Xho1 R                                                              | pET28a-Sr35 (synthetic gene)                                   | double digestion-ligation cloning  |
| SUMO-Sr35 <sup>Δ20</sup>               | pFastBac 1     | Sr35 <sup>Δ20</sup> BamH1 F, Sr35 Xho1 R                                                              | pET28a-Sr35 (synthetic gene)                                   | double digestion-ligation cloning  |
| SUMO-Sr35 <sup>Q139A</sup>             | pFastBac 1     | Sr35 <sup>Q139A</sup> F, Sr35 <sup>Q139A</sup> R                                                      | pFastBac 1-SUMO-Sr35                                           | double digestion-ligation cloning  |
| SUMO-Sr35 <sup>Y141A</sup>             | pFastBac 1     | Sr35 <sup>Y141A</sup> F, Sr35 <sup>Y141A</sup> R                                                      | pFastBac 1-SUMO-Sr35                                           | double digestion-ligation cloning  |
| SUMO-Sr35 <sup>R157A</sup>             | pFastBac 1     | Sr35 <sup>R157A</sup> F, Sr35 <sup>R157A</sup> R                                                      | pFastBac 1-SUMO-Sr35                                           | double digestion-ligation cloning  |
| SUMO-Sr35 <sup>K206A</sup>             | pFastBac 1     | Sr35 <sup>K206A</sup> F, Sr35 <sup>K206A</sup> R                                                      | pFastBac 1-SUMO-Sr35                                           | double digestion-ligation cloning  |
| SUMO-Sr35 <sup>R311A</sup>             | pFastBac 1     | Sr35 <sup>R311A</sup> F, Sr35 <sup>R311A</sup> R                                                      | pFastBac 1-SUMO-Sr35                                           | double digestion-ligation cloning  |
| SUMO-Sr35 <sup>Y654A</sup>             | pFastBac 1     | Sr35 <sup>Y654A</sup> F, Sr35 <sup>Y654A</sup> R                                                      | pFastBac 1-SUMO-Sr35                                           | double digestion-ligation cloning  |
| SUMO-Sr35 <sup>D673A</sup>             | pFastBac 1     | Sr35 <sup>D673A</sup> F, Sr35 <sup>D673A</sup> R                                                      | pFastBac 1-SUMO-Sr35                                           | double digestion-ligation cloning  |
| SUMO-Sr35 <sup>R730A</sup>             | pFastBac 1     | Sr35 <sup>R730A</sup> F, Sr35 <sup>R730A</sup> R                                                      | pFastBac 1-SUMO-Sr35                                           | double digestion-ligation cloning  |
| SUMO-Sr35 <sup>R755A</sup>             | pFastBac 1     | Sr35 <sup>R755A</sup> F, Sr35 <sup>R755A</sup> R                                                      | pFastBac 1-SUMO-Sr35                                           | double digestion-ligation cloning  |
| SUMO-Sr35 <sup>R730A/R755A</sup>       | pFastBac 1     | Sr35 <sup>R730A</sup> F, Sr35 <sup>R730A</sup> R,<br>Sr35 <sup>R755A</sup> F, Sr35 <sup>R755A</sup> R | pFastBac 1-SUMO-Sr35,<br>pFastBac 1-SUMO-Sr35 <sup>R730A</sup> | double digestion-ligation cloning  |
| SUMO-Sr35 <sup>E809A</sup>             | pFastBac 1     | Sr35 <sup>E809A</sup> F, Sr35 <sup>E809A</sup> R                                                      | pFastBac 1-SUMO-Sr35                                           | double digestion-ligation cloning  |
| SUMO-Sr35 <sup>R854H/W856R/T858S</sup> | pFastBac 1     | Sr35 <sup>R854H/W856R/T858S</sup> F, Sr35 <sup>R854H/W856R/T858S</sup> R                              | pFastBac 1-SUMO-Sr35                                           | double digestion-ligation cloning  |
| AvrSr35 ΔSP                            | pMCSG7         | AvrSr35 ΔSP LIC F,<br>AvrSr35 ΔSP LIC R                                                               | pET28a-AvrSr35 (synthetic gene)                                | ligation-independent cloning (LIC) |
| AvrSr35 <sup>D291A</sup> ΔSP           | pMCSG7         | AvrSr35 <sup>D291A</sup> ΔSP F,<br>AvrSr35 <sup>D291A</sup> ΔSP R                                     | pMCSG7 -AvrSr35 ΔSP                                            | ligation-independent cloning (LIC) |
| AvrSr35 <sup>D350A</sup> ΔSP           | pMCSG7         | AvrSr35 <sup>D350A</sup> ΔSP F,<br>AvrSr35 <sup>D350A</sup> ΔSP R                                     | pMCSG7 -AvrSr35 ΔSP                                            | ligation-independent cloning (LIC) |

**Table S5. Cont.**

| <b>Construct</b>                   | <b>Plasmid</b> | <b>Primers</b>                                                                | <b>Template</b>                 | <b>Cloning method</b>              |
|------------------------------------|----------------|-------------------------------------------------------------------------------|---------------------------------|------------------------------------|
| AvrSr35 <sup>D379A</sup> ΔSP       | pMCSG7         | AvrSr35 <sup>D379A</sup> ΔSP F,<br>AvrSr35 <sup>D379A</sup> ΔSP R             | pMCSG7 -AvrSr35 ΔSP             | ligation-independent cloning (LIC) |
| AvrSr35 <sup>D379A/G380A</sup> ΔSP | pMCSG7         | AvrSr35 <sup>D379A/G380A</sup> ΔSP F,<br>AvrSr35 <sup>D379A/G380A</sup> ΔSP R | pMCSG7 -AvrSr35 ΔSP             | ligation-independent cloning (LIC) |
| AvrSr35 <sup>R381A</sup> ΔSP       | pMCSG7         | AvrSr35 <sup>R381A</sup> ΔSP F,<br>AvrSr35 <sup>R381A</sup> ΔSP R             | pMCSG7 -AvrSr35 ΔSP             | ligation-independent cloning (LIC) |
| AvrSr35 <sup>Y383A</sup> ΔSP       | pMCSG7         | AvrSr35 <sup>Y383A</sup> ΔSP F,<br>AvrSr35 <sup>Y383A</sup> ΔSP R             | pMCSG7 -AvrSr35 ΔSP             | ligation-independent cloning (LIC) |
| AvrSr35 <sup>Y387A</sup> ΔSP       | pMCSG7         | AvrSr35 <sup>Y387A</sup> ΔSP F,<br>AvrSr35 <sup>Y387A</sup> ΔSP R             | pMCSG7 -AvrSr35 ΔSP             | ligation-independent cloning (LIC) |
| AvrSr35 <sup>E401A</sup> ΔSP       | pMCSG7         | AvrSr35 <sup>E401A</sup> ΔSP F,<br>AvrSr35 <sup>E401A</sup> ΔSP R             | pMCSG7 -AvrSr35 ΔSP             | ligation-independent cloning (LIC) |
| GST-AvrSr35 ΔSP                    | pGEX-6P-1      | AvrSr35 ΔSP BamH1 F,<br>AvrSr35 ΔSP Xho1 R                                    | pET28a-AvrSr35 (synthetic gene) | double digestion-ligation cloning  |
| GST-AvrSr35 <sup>D291A</sup> ΔSP   | pGEX-6P-1      | AvrSr35 <sup>D291A</sup> ΔSP F,<br>AvrSr35 <sup>D291A</sup> ΔSP R             | pGEX-6P-1-AvrSr35 ΔSP           | double digestion-ligation cloning  |
| GST-AvrSr35 <sup>D350A</sup> ΔSP   | pGEX-6P-1      | AvrSr35 <sup>D350A</sup> ΔSP F,<br>AvrSr35 <sup>D350A</sup> ΔSP R             | pGEX-6P-1-AvrSr35 ΔSP           | double digestion-ligation cloning  |
| GST-AvrSr35 <sup>R381A</sup> ΔSP   | pGEX-6P-1      | AvrSr35 <sup>R381A</sup> ΔSP F,<br>AvrSr35 <sup>R381A</sup> ΔSP R             | pGEX-6P-1-AvrSr35 ΔSP           | double digestion-ligation cloning  |
| GST-AvrSr35 <sup>Y387A</sup> ΔSP   | pGEX-6P-1      | AvrSr35 <sup>Y387A</sup> ΔSP F,<br>AvrSr35 <sup>Y387A</sup> ΔSP R             | pGEX-6P-1-AvrSr35 ΔSP           | double digestion-ligation cloning  |

**Table S6. Plasmids generated in this study for entry clones for *N. benthamiana* assays.**

| Construct                         | Plasmid  | Primers                                                                                               | Template                                      | Cloning method |
|-----------------------------------|----------|-------------------------------------------------------------------------------------------------------|-----------------------------------------------|----------------|
| Sr35                              | pDONR207 | Sr35 BP F, Sr35 BP R                                                                                  | pET28a-Sr35 (synthetic gene)                  | BP Gateway     |
| Sr35 <sup>Δ12</sup>               | pDONR207 | Sr35 <sup>Δ12</sup> BP F, Sr35 BP R                                                                   | pET28a-Sr35 (synthetic gene)                  | BP Gateway     |
| Sr35 <sup>Δ20</sup>               | pDONR207 | Sr35 <sup>Δ20</sup> BP F, Sr35 BP R                                                                   | pET28a-Sr35 (synthetic gene)                  | BP Gateway     |
| Sr35 <sup>Q139A</sup>             | pDONR207 | Sr35 <sup>Q139A</sup> F, Sr35 <sup>Q139A</sup> R                                                      | pDONR207-Sr35                                 | BP Gateway     |
| Sr35 <sup>Y141A</sup>             | pDONR207 | Sr35 <sup>Y141A</sup> F, Sr35 <sup>Y141A</sup> R                                                      | pDONR207-Sr35                                 | BP Gateway     |
| Sr35 <sup>R157A</sup>             | pDONR207 | Sr35 <sup>R157A</sup> F, Sr35 <sup>R157A</sup> R                                                      | pDONR207-Sr35                                 | BP Gateway     |
| Sr35 <sup>K206A</sup>             | pDONR207 | Sr35 <sup>K206A</sup> F, Sr35 <sup>K206A</sup> R                                                      | pDONR207-Sr35                                 | BP Gateway     |
| Sr35 <sup>R311A</sup>             | pDONR207 | Sr35 <sup>R311A</sup> F, Sr35 <sup>R311A</sup> R                                                      | pDONR207-Sr35                                 | BP Gateway     |
| Sr35 <sup>Y654A</sup>             | pDONR207 | Sr35 <sup>Y654A</sup> F, Sr35 <sup>Y654A</sup> R                                                      | pDONR207-Sr35                                 | BP Gateway     |
| Sr35 <sup>D673A</sup>             | pDONR207 | Sr35 <sup>D673A</sup> F, Sr35 <sup>D673A</sup> R                                                      | pDONR207-Sr35                                 | BP Gateway     |
| Sr35 <sup>R730A</sup>             | pDONR207 | Sr35 <sup>R730A</sup> F, Sr35 <sup>R730A</sup> R                                                      | pDONR207-Sr35                                 | BP Gateway     |
| Sr35 <sup>R755A</sup>             | pDONR207 | Sr35 <sup>R755A</sup> F, Sr35 <sup>R755A</sup> R                                                      | pDONR207-Sr35                                 | BP Gateway     |
| Sr35 <sup>R730A/R755A</sup>       | pDONR207 | Sr35 <sup>R730A</sup> F, Sr35 <sup>R730A</sup> R,<br>Sr35 <sup>R755A</sup> F, Sr35 <sup>R755A</sup> R | pDONR207-Sr35, pDONR207-Sr35 <sup>R730A</sup> | BP Gateway     |
| Sr35 <sup>E809A</sup>             | pDONR207 | Sr35 <sup>E809A</sup> F, Sr35 <sup>E809A</sup> R                                                      | pDONR207-Sr35                                 | BP Gateway     |
| Sr35 <sup>R854H/W856R/T858S</sup> | pDONR207 | Sr35 <sup>R854H/W856R/T858S</sup> F,<br>Sr35 <sup>R854H/W856R/T858S</sup> R                           | pDONR207-Sr35                                 | BP Gateway     |
| Sr35 <sup>E2A</sup>               | pDONR207 | Sr35 <sup>E2A</sup> F, Sr35 <sup>E2A</sup> R                                                          | pDONR207-Sr35                                 | BP Gateway     |
| Sr35 <sup>I3A</sup>               | pDONR207 | Sr35 <sup>I3A</sup> F, Sr35 <sup>I3A</sup> R                                                          | pDONR207-Sr35                                 | BP Gateway     |
| Sr35 <sup>M5A</sup>               | pDONR207 | Sr35 <sup>M5A</sup> F, Sr35 <sup>M5A</sup> R                                                          | pDONR207-Sr35                                 | BP Gateway     |
| Sr35 <sup>G6A</sup>               | pDONR207 | Sr35 <sup>G6A</sup> F, Sr35 <sup>G6A</sup> R                                                          | pDONR207-Sr35                                 | BP Gateway     |
| Sr35 <sup>I8A</sup>               | pDONR207 | Sr35 <sup>I8A</sup> F, Sr35 <sup>I8A</sup> R                                                          | pDONR207-Sr35                                 | BP Gateway     |
| Sr35 <sup>G9A</sup>               | pDONR207 | Sr35 <sup>G9A</sup> F, Sr35 <sup>G9A</sup> R                                                          | pDONR207-Sr35                                 | BP Gateway     |
| Sr35 <sup>S10A</sup>              | pDONR207 | Sr35 <sup>S10A</sup> F, Sr35 <sup>S10A</sup> R                                                        | pDONR207-Sr35                                 | BP Gateway     |

**Table S6. Cont.**

| <b>Construct</b>                           | <b>Plasmid</b> | <b>Primers</b>                                                                                | <b>Template</b>                 | <b>Cloning method</b> |
|--------------------------------------------|----------------|-----------------------------------------------------------------------------------------------|---------------------------------|-----------------------|
| Sr35 <sup>L11A</sup>                       | pDONR207       | Sr35 <sup>L11A</sup> F, Sr35 <sup>L11A</sup> R                                                | pDONR207-Sr35                   | BP Gateway            |
| Sr35 <sup>L12A</sup>                       | pDONR207       | Sr35 <sup>L12A</sup> F, Sr35 <sup>L12A</sup> R                                                | pDONR207-Sr35                   | BP Gateway            |
| Sr35 <sup>K14A</sup>                       | pDONR207       | Sr35 <sup>K14A</sup> F, Sr35 <sup>K14A</sup> R                                                | pDONR207-Sr35                   | BP Gateway            |
| Sr35 <sup>L15A</sup>                       | pDONR207       | Sr35 <sup>L15A</sup> F, Sr35 <sup>L15A</sup> R                                                | pDONR207-Sr35                   | BP Gateway            |
| Sr35 <sup>E17A</sup>                       | pDONR207       | Sr35 <sup>E17A</sup> F, Sr35 <sup>E17A</sup> R                                                | pDONR207-Sr35                   | BP Gateway            |
| Sr35 <sup>L18A</sup>                       | pDONR207       | Sr35 <sup>L18A</sup> F, Sr35 <sup>L18A</sup> R                                                | pDONR207-Sr35                   | BP Gateway            |
| Sr35 <sup>L19A</sup>                       | pDONR207       | Sr35 <sup>L19A</sup> F, Sr35 <sup>L19A</sup> R                                                | pDONR207-Sr35                   | BP Gateway            |
| AvrSr35 C-stop $\Delta$ SP                 | pDONR207       | AvrSr35 C-stop $\Delta$ SP BP F,<br>AvrSr35 C-stop $\Delta$ SP BP R                           | pET28a-AvrSr35 (synthetic gene) | BP Gateway            |
| AvrSr35 <sup>D291A</sup> $\Delta$ SP       | pDONR207       | AvrSr35 <sup>D291A</sup> $\Delta$ SP F,<br>AvrSr35 <sup>D291A</sup> $\Delta$ SP R             | pDONR207-AvrSr35                | BP Gateway            |
| AvrSr35 <sup>D350A</sup> $\Delta$ SP       | pDONR207       | AvrSr35 <sup>D350A</sup> $\Delta$ SP F,<br>AvrSr35 <sup>D350A</sup> $\Delta$ SP R             | pDONR207-AvrSr35                | BP Gateway            |
| AvrSr35 <sup>D379A</sup> $\Delta$ SP       | pDONR207       | AvrSr35 <sup>D379A</sup> $\Delta$ SP F,<br>AvrSr35 <sup>D379A</sup> $\Delta$ SP R             | pDONR207-AvrSr35                | BP Gateway            |
| AvrSr35 <sup>D379A/G380A</sup> $\Delta$ SP | pDONR207       | AvrSr35 <sup>D379A/G380A</sup> $\Delta$ SP F,<br>AvrSr35 <sup>D379A/G380A</sup> $\Delta$ SP R | pDONR207-AvrSr35                | BP Gateway            |
| AvrSr35 <sup>R381A</sup> $\Delta$ SP       | pDONR207       | AvrSr35 <sup>R381A</sup> $\Delta$ SP F,<br>AvrSr35 <sup>R381A</sup> $\Delta$ SP R             | pDONR207-AvrSr35                | BP Gateway            |
| AvrSr35 <sup>Y383A</sup> $\Delta$ SP       | pDONR207       | AvrSr35 <sup>Y383A</sup> $\Delta$ SP F,<br>AvrSr35 <sup>Y383A</sup> $\Delta$ SP R             | pDONR207-AvrSr35                | BP Gateway            |



**Table S6. Cont.**

| <b>Construct</b>             | <b>Plasmid</b> | <b>Primers</b>                                                    | <b>Template</b>  | <b>Cloning method</b> |
|------------------------------|----------------|-------------------------------------------------------------------|------------------|-----------------------|
| AvrSr35 <sup>Y387A</sup> ΔSP | pDONR207       | AvrSr35 <sup>Y387A</sup> ΔSP F,<br>AvrSr35 <sup>Y387A</sup> ΔSP R | pDONR207-AvrSr35 | BP Gateway            |
| AvrSr35 <sup>E401A</sup> ΔSP | pDONR207       | AvrSr35 <sup>E401A</sup> ΔSP F,<br>AvrSr35 <sup>E401A</sup> ΔSP R | pDONR207-AvrSr35 | BP Gateway            |
| PIP2::mCherry C-stop         | pDONR207       | -                                                                 | synthetic gene   | BP Gateway            |

**Table S7. Plasmids generated in this study. For cell-death assays, and confocal microscopy in *N. benthamiana*.**

| Construct                                | Plasmid | Primers | Template                                   | Cloning method |
|------------------------------------------|---------|---------|--------------------------------------------|----------------|
| Sr35::eGFP                               | pK7FWG2 | -       | pDONR207-Sr35                              | LR Gateway     |
| Sr35 <sup>Δ12</sup> ::eGFP               | pK7FWG2 | -       | pDONR207-Sr35 <sup>Δ12</sup>               | LR Gateway     |
| Sr35 <sup>Δ20</sup> ::eGFP               | pK7FWG2 | -       | pDONR207-Sr35 <sup>Δ20</sup>               | LR Gateway     |
| Sr35 <sup>Q139A</sup> ::eGFP             | pK7FWG2 | -       | pDONR207-Sr35 <sup>Q139A</sup>             | LR Gateway     |
| Sr35 <sup>Y141A</sup> ::eGFP             | pK7FWG2 | -       | pDONR207-Sr35 <sup>Y141A</sup>             | LR Gateway     |
| Sr35 <sup>R157A</sup> ::eGFP             | pK7FWG2 | -       | pDONR207-Sr35 <sup>R157A</sup>             | LR Gateway     |
| Sr35 <sup>K206A</sup> ::eGFP             | pK7FWG2 | -       | pDONR207-Sr35 <sup>K206A</sup>             | LR Gateway     |
| Sr35 <sup>R311A</sup> ::eGFP             | pK7FWG2 | -       | pDONR207-Sr35 <sup>R311A</sup>             | LR Gateway     |
| Sr35 <sup>Y654A</sup> ::eGFP             | pK7FWG2 | -       | pDONR207-Sr35 <sup>Y654A</sup>             | LR Gateway     |
| Sr35 <sup>D673A</sup> ::eGFP             | pK7FWG2 | -       | pDONR207-Sr35 <sup>D673A</sup>             | LR Gateway     |
| Sr35 <sup>R730A</sup> ::eGFP             | pK7FWG2 | -       | pDONR207-Sr35 <sup>R730A</sup>             | LR Gateway     |
| Sr35 <sup>R755A</sup> ::eGFP             | pK7FWG2 | -       | pDONR207-Sr35 <sup>R755A</sup>             | LR Gateway     |
| Sr35 <sup>R730A/R755A</sup> ::eGFP       | pK7FWG2 | -       | pDONR207-Sr35 <sup>R730A/R755A</sup>       | LR Gateway     |
| Sr35 <sup>E809A</sup> ::eGFP             | pK7FWG2 | -       | pDONR207-Sr35 <sup>E809A</sup>             | LR Gateway     |
| Sr35 <sup>R854H/W856R/T858S</sup> ::eGFP | pK7FWG2 | -       | pDONR207-Sr35 <sup>R854H/W856R/T858S</sup> | LR Gateway     |
| Sr35 <sup>E2A</sup> ::eGFP               | pK7FWG2 | -       | pDONR207-Sr35 <sup>E2A</sup>               | LR Gateway     |
| Sr35 <sup>I3A</sup> ::eGFP               | pK7FWG2 | -       | pDONR207-Sr35 <sup>I3A</sup>               | LR Gateway     |
| Sr35 <sup>M5A</sup> ::eGFP               | pK7FWG2 | -       | pDONR207-Sr35 <sup>M5A</sup>               | LR Gateway     |
| Sr35 <sup>G6A</sup> ::eGFP               | pK7FWG2 | -       | pDONR207-Sr35 <sup>G6A</sup>               | LR Gateway     |
| Sr35 <sup>I8A</sup> ::eGFP               | pK7FWG2 | -       | pDONR207-Sr35 <sup>I8A</sup>               | LR Gateway     |
| Sr35 <sup>S10A</sup> ::eGFP              | pK7FWG2 | -       | pDONR207-Sr35 <sup>S10A</sup>              | LR Gateway     |
| Sr35 <sup>L11A</sup> ::eGFP              | pK7FWG2 | -       | pDONR207-Sr35 <sup>L11A</sup>              | LR Gateway     |
| Sr35 <sup>L12A</sup> ::eGFP              | pK7FWG2 | -       | pDONR207-Sr35 <sup>L12A</sup>              | LR Gateway     |
| Sr35 <sup>K14A</sup> ::eGFP              | pK7FWG2 | -       | pDONR207-Sr35 <sup>K14A</sup>              | LR Gateway     |

**Table S7. Cont.**

| <b>Construct</b>                                 | <b>Plasmid</b> | <b>Primers</b> | <b>Template</b>                         | <b>Cloning method</b> |
|--------------------------------------------------|----------------|----------------|-----------------------------------------|-----------------------|
| Sr35 <sup>L15A</sup> ::eGFP                      | pK7FWG2        | -              | pDONR207-Sr35 <sup>L15A</sup>           | LR Gateway            |
| Sr35 <sup>E17A</sup> ::eGFP                      | pK7FWG2        | -              | pDONR207-Sr35 <sup>E17A</sup>           | LR Gateway            |
| Sr35 <sup>L18A</sup> ::eGFP                      | pK7FWG2        | -              | pDONR207-Sr35 <sup>L18A</sup>           | LR Gateway            |
| Sr35 <sup>L19A</sup> ::eGFP                      | pK7FWG2        | -              | pDONR207-Sr35 <sup>L19A</sup>           | LR Gateway            |
| eGFP::AvrSr35 $\Delta$ SP                        | pK7WGF2        | -              | pDONR207-AvrSr35                        | LR Gateway            |
| AvrSr35 $\Delta$ SP C-stop                       | pK7FWG2        | -              | pDONR207-AvrSr35                        | LR Gateway            |
| eGFP::AvrSr35 <sup>D291A</sup> $\Delta$ SP       | pK7WGF2        | -              | pDONR207-AvrSr35 <sup>D291A</sup>       | LR Gateway            |
| eGFP::AvrSr35 <sup>D350A</sup> $\Delta$ SP       | pK7WGF2        | -              | pDONR207-AvrSr35 <sup>D350A</sup>       | LR Gateway            |
| eGFP::AvrSr35 <sup>D379A</sup> $\Delta$ SP       | pK7WGF2        | -              | pDONR207-AvrSr35 <sup>D379A</sup>       | LR Gateway            |
| eGFP::AvrSr35 <sup>D379A/G380A</sup> $\Delta$ SP | pK7WGF2        | -              | pDONR207-AvrSr35 <sup>D379A/G380A</sup> | LR Gateway            |
| eGFP::AvrSr35 <sup>R381A</sup> $\Delta$ SP       | pK7WGF2        | -              | pDONR207-AvrSr35 <sup>R381A</sup>       | LR Gateway            |
| eGFP::AvrSr35 <sup>Y383A</sup> $\Delta$ SP       | pK7WGF2        | -              | pDONR207-AvrSr35 <sup>Y383A</sup>       | LR Gateway            |
| eGFP::AvrSr35 <sup>Y387A</sup> $\Delta$ SP       | pK7WGF2        | -              | pDONR207-AvrSr35 <sup>Y387A</sup>       | LR Gateway            |
| eGFP::AvrSr35 <sup>E401A</sup> $\Delta$ SP       | pK7WGF2        | -              | pDONR207-AvrSr35 <sup>E401A</sup>       | LR Gateway            |
| PIP::mCherry C-stop                              | pK7WGF2        | -              | pDONR207-PIP2;2-M-Cherry C-stop         | LR Gateway            |

**Table S8. Products used in this study.**

| <b>Resource</b>                            | <b>Source</b>              | <b>Identifier</b> |
|--------------------------------------------|----------------------------|-------------------|
| <b>Bacterial, cell and plant materials</b> |                            |                   |
| <i>Escherichia coli</i> Rosetta (DE3)      | Weidi Biotechnology        | CAT#: EC1010      |
| <i>Escherichia coli</i> DH5 $\alpha$       | Weidi Biotechnology        | CAT#: DL1001      |
| <i>Escherichia coli</i> DH10Bac            | Weidi Biotechnology        | CAT#: DL1071      |
| Agrobacterium strain GV3101                | Weidi Biotechnology        | CAT#: AC1004      |
| Spodoptera frugiperda 9 (Sf9) insect cells | Thermo Fisher              | CAT#: A35243      |
| <i>Arabidopsis thaliana</i> Col-0          | provided by the Laboratory | -                 |
| <i>Nicotiana benthamiana</i>               | provided by the Laboratory | -                 |
| <b>Antibodies</b>                          |                            |                   |
| anti-GST antibody                          | Abcam                      | CAT#: ab138491    |
| anti-His antibody                          | Abcam                      | CAT#: ab18184     |
| <b>Chemicals and reagents</b>              |                            |                   |
| Cellfectin® Reagent                        | Thermo Fisher              | CAT#: A38915      |
| KOD-plus-neo                               | TOYOBO                     | CAT#: KOD-401     |
| T4 DNA ligase                              | Thermo Fisher              | CAT#: EL0014      |
| T4 DNA polymerase                          | Thermo Fisher              | CAT#: 18005025    |
| BamH1                                      | NEB                        | CAT#: R0136S      |
| Xho1                                       | NEB                        | CAT#: R0146S      |
| SSP1                                       | NEB                        | CAT#: R0132S      |
| Dpn1                                       | NEB                        | CAT#: R0176S      |
| ATP                                        | Sigma                      | CAT#: FLAAS       |
| Gateway™ LR Clonase™                       | Thermo Fisher              | CAT#: 11789013    |
| Gateway™ BP Clonase™ II                    | Thermo Fisher              | CAT#: 11789100    |
| <b>Essential Commercial Assays</b>         |                            |                   |
| Plasmid mini kit                           | Omega                      | CAT#: D6943-02    |
| Gel-Extraction Kit                         | Omega                      | CAT#: D2500-02    |
